# Supplementary material
Source: Springer Nature journal article supplement (https://mijn.bsl.nl/resource/supplementary/13047_2009_118_MOESM2_ESM.pdf/7473890)
Supplement: MOESM2 [file 7473890]

---

| <b>Response<br/>on 15 point Likert scale</b> | <b>Corresponding mean change<br/>on outcome measure<br/>(e.g. VAS or FHSQ)</b> | <b>Minimal<br/>Important<br/>Difference</b> |
|----------------------------------------------|--------------------------------------------------------------------------------|---------------------------------------------|
|----------------------------------------------|--------------------------------------------------------------------------------|---------------------------------------------|

---

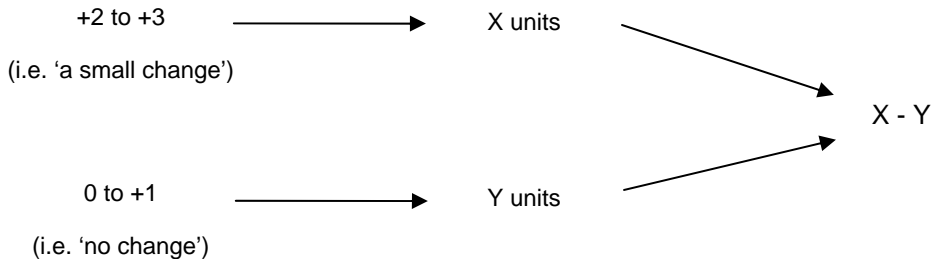

Notes: VAS =Visual Analogue Scale, FHSQ = Foot Health Status Questionnaire
